# Supplementary material
Source: publisher figshare collection journal article supplement (https://acs.figshare.com/ndownloader/files/4561786)

**Characterization of Surface Bound Zr(IV) and its Application to  
Removal of As(V) and As(III) from Aqueous Systems using Phosphonic  
Acid Modified Nano-porous Silica Polyamine Composites**

**Varadharajan Kailasam, Edward Rosenberg<sup>\*</sup> and Daniel Nielsen**

*Department of Chemistry, The University of Montana, Missoula, MT 59812, USA*

**Figure S1. Pourbaix Diagram for Arsenic Speciation**

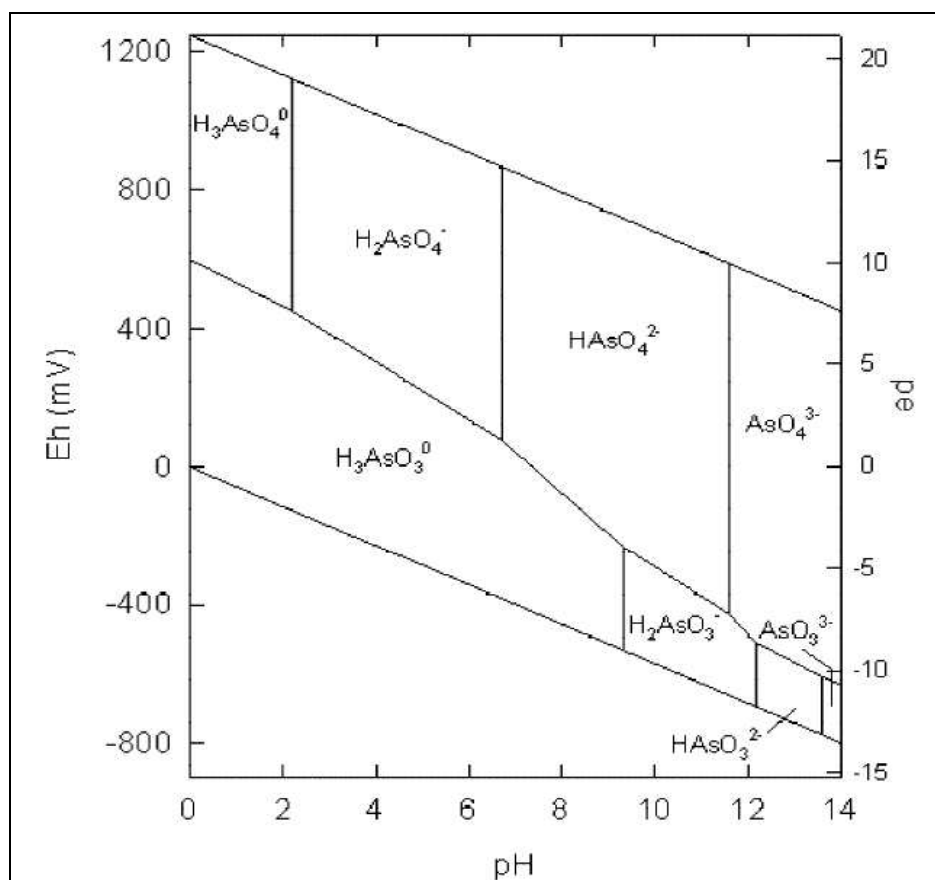

**Figure S2. Breakthrough Curves for Arsenate (top) and Arsenite (bottom) Sorption on ZrBPAP at various pH Values:** Breakthrough curves were run at pH = 2–8 for arsenate and at pH = 2–10 for arsenite capture with **ZrBPAP**. Both were run in 5mL columns at the flow rates indicated in the respective figures.

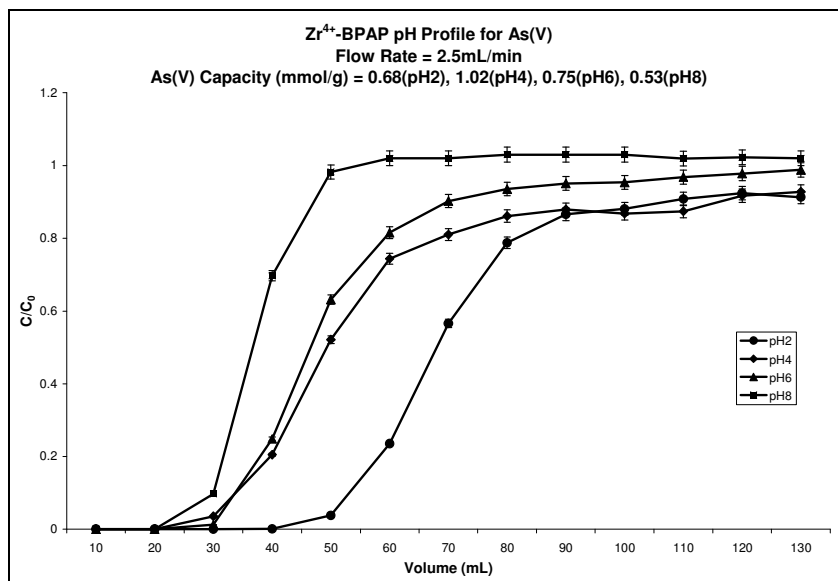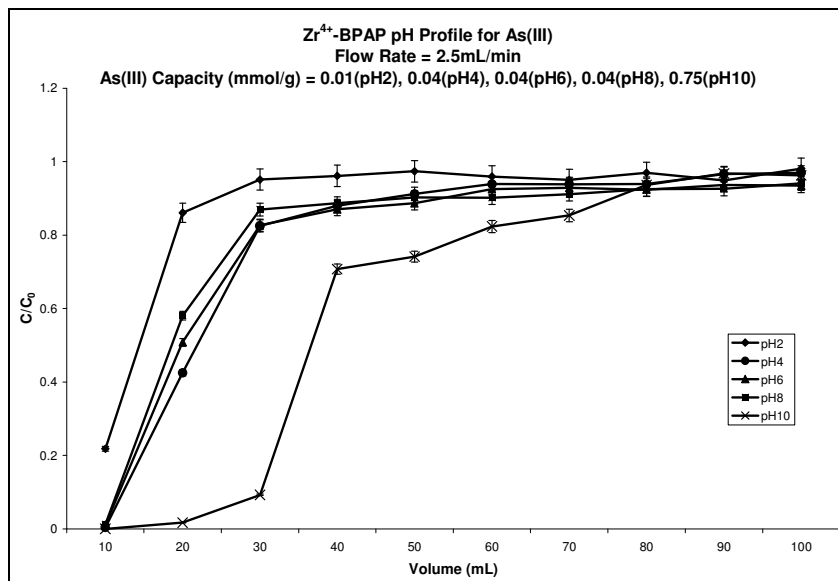

**Figure S3** Schematic Diagram of Apparatus Used for Longevity Testing of **ZrBPAP**

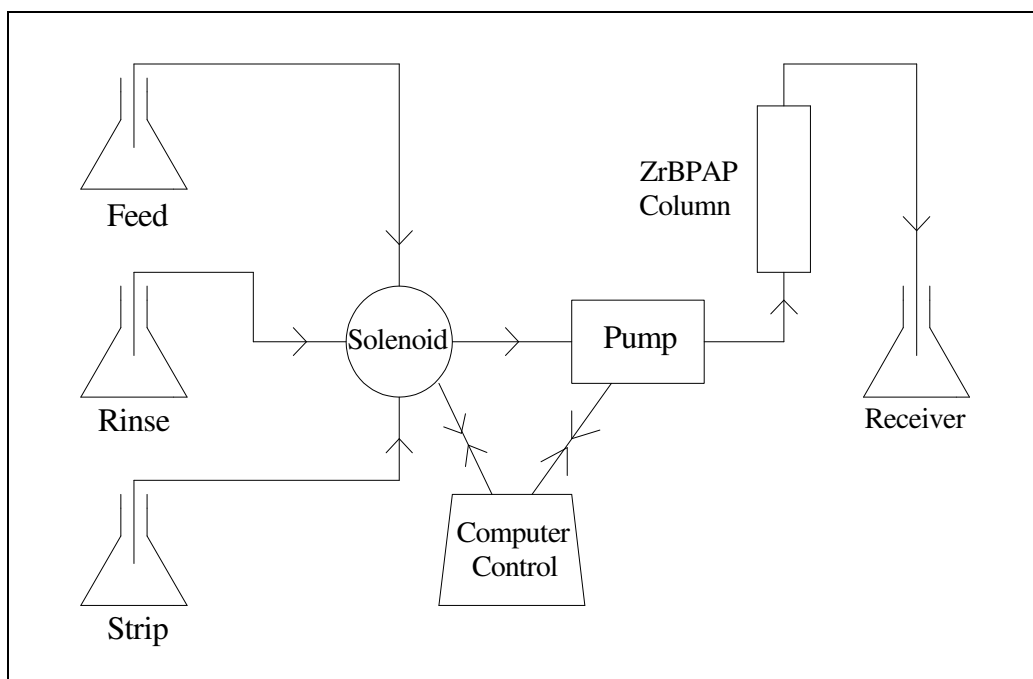

Supplement: Supplementary file 1 [file 4561786]
